# Supplementary material for: Impact of the Epigenetically Regulated Hoxa-5 Gene in Neural Differentiation from Human Adipose-Derived Stem Cells
Source: MDPI journal article supplement (doi:10.3390/biology10080802), 2021-08-19
Supplement: s1 [file s1]

Archive with 5 entries (5 files):
- Supplementary methods.pdf
- Supplementary Table S1.pdf
- Supplementary Table S2.pdf
- Supplementary Table S3.pdf
- Supplementary Table S4.xlsx
