# Supplementary material for: Impact of the Epigenetically Regulated Hoxa-5 Gene in Neural Differentiation from Human Adipose-Derived Stem Cells
Source: MDPI journal article supplement (doi:10.3390/biology10080802), 2021-08-19
Supplement: s1 [file s1 › Supplementary Table S1.pdf]

**Table S1.** mAb antibodies used in immunofluorescence (IF) and western blot (WB).

| mAbs                                                 | IF/WB<br>Dilution | Reference                                                              |
|------------------------------------------------------|-------------------|------------------------------------------------------------------------|
| sodium voltage-gated channel alpha subunit-9 (SCN9A) | 1:50/1:400        | <i>Na<sup>+</sup> CP type IXa Antibody H-17, sc-130096; Santa Cruz</i> |
| synaptosome associated protein-25 (SNAP-25)          | 1:200/1:400       | <i>SNAP-25 Antibody C-18, sc7538; Santa Cruz</i>                       |
| tubulin-III (TUB-III)                                | 1:200/1:1000      | <i>Anti-tubulin Antibody beta III isoform, MAB1637; Millipore</i>      |
| nestin (NES)                                         | 1:100/1:500       | <i>Nestin Antibody, sc-23927; Santa Cruz</i>                           |
| choline O-acetyltransferase (CHAT)                   | 1:200/1:400       | <i>Choactase antibody E-7, sc-55557; Santa Cruz</i>                    |
| glial fibrillary acidic protein (GFAP)               | 1:50/1:500        | <i>GFAP Antibody GA-5, sc-58766; Santa Cruz</i>                        |
| microtubule associated protein-2 (MAP2)              | 1:50/1:500        | <i>MAP2 antibody A-4, sc74421; Santa Cruz</i>                          |
| O4 forkhead box (FOXO-4)                             | 1:200/1:100       | <i>Anti-FOXO-4, sab4501887; Sigma</i>                                  |
| tyroxine hydroxylase (TH)                            | 1:2500/1:4000     | <i>Anti-tyrosine hydroxylase antibody, T2928; Sigma</i>                |
| enolase (ENS)                                        | 1:100/1:400       | <i>Enolase 5G10, sc-51882; Santa Cruz</i>                              |
| Tau protein (TAU)                                    | 1:50/1:100        | <i>Anti-Tau antibody TAU-5, ab3931; ABCAM</i>                          |
| Neurofilament (NFM)                                  | 1:100/1:800       | <i>Anti-Neurofilament antibody, 05744; Millipore</i>                   |
| galactosylceramidase (GalC)                          | 1:50/1:500        | <i>Anti-GalC antibody, mab342; Millipore</i>                           |
| n-cadherin                                           | 1:40/-            | <i>N-cadherin antibody, sc-7939; Santa Cruz</i>                        |
| vimentin                                             | 1:50 /-           | <i>Vimentin antibody, sc6260; Santa Cruz</i>                           |
| $\beta$ -actin                                       | -/1:10000         | <i><math>\beta</math>-actin antibody,, A3854, Sigma Aldrich</i>        |
