# Supplementary material for: Impact of the Epigenetically Regulated Hoxa-5 Gene in Neural Differentiation from Human Adipose-Derived Stem Cells
Source: MDPI journal article supplement (doi:10.3390/biology10080802), 2021-08-19
Supplement: s1 [file s1 › Supplementary Table S2.pdf]

**Table S2.** Primer sequences

| Primers used in RT-PCR                                                 |                                  |      |                               |      |
|------------------------------------------------------------------------|----------------------------------|------|-------------------------------|------|
| GENE                                                                   | FORWARD                          | Tm   | REVERSE                       | Tm   |
| SCN9A                                                                  | 5'-CTTCATCTATGGGGACATTC-3'       | 58.4 | 5'-GTCTTTTGTCTGCATAGTAGG-3'   | 57.2 |
| SNP25                                                                  | 5'-AAGGCTGATTCCAACAAAAC-3'       | 60.6 | 5'-GAAAAGCATGAAGGAGCTATC-3'   | 59.5 |
| TUBIII                                                                 | 5'-GCGTCTACTACAACGAGG-3'         | 5.8  | 5'-ACTCTGACCAAAGATGAAATTG-3'  | 59.7 |
| NESTIN                                                                 | 5'-CACCTCAAGATGTCCCTC-3'         | 58.0 | 5'-TTGGGGTCCTGAAAGC-3'        | 59.7 |
| CHAT                                                                   | 5'-TCAGTTCTTTGTCTTGATG-3'        | 57.8 | 5'-TGGAAGCCATTTTGACTATC-3'    | 59.2 |
| GFAP                                                                   | 5'-GCAGATTCGAGAAACCAG-3'         | 58.4 | 5'-CACATCACATCCTTGTGC-3'      | 58.5 |
| MAP2                                                                   | 5'-GAAGATTTACTTACAGCCTCG-3'      | 57.2 | 5'-GGTAAGTTTTAGTTGTCTCTGG-3'  | 56.2 |
| FOXO4                                                                  | 5'-GATATGTATATGGAGAACCTGG-3'     | 56.5 | 5'-AGAGTAGATATGAACACGCC-3'    | 55.8 |
| NFM                                                                    | 5'-GCTGCGTACAGAAAATC-3'          | 56.0 | 5'-CCTTGGGTTTCTGAATCTTAC-3'   | 59.1 |
| GALC                                                                   | 5'-ATATGCTTTAGGACGTGTTG-3'       | 56.8 | 5'-GAGGTGAAATGACCCTTAATAG-3'  | 58.2 |
| B-ACTIN                                                                | 5'-AGCCTCGCCTTTGCCGATCC-3'       | 65.0 | 5'-ACATGCCGGAGCCGTTGTCTG-3'   | 65.0 |
| HOXA5                                                                  | 5'-TTAAAAAATAAATGAGTTTTTATTTG-3' | 56.4 | 5'-ACCAACCCCCTCTCTACTACTA-3'  | 59.4 |
| Primers used in bisulfite genomic sequencing of multiple clones        |                                  |      |                               |      |
| GENE                                                                   | FORWARD                          | Tm   | REVERSE                       | Tm   |
| FGFR1                                                                  | 5'-TGGAGTATCTGGCCTCCAAG-3'       | 60.2 | 5'- ACCCTTCTCTTCCTACAACCTA-3' | 59.5 |
| GRM4                                                                   | 5'-CGTGCCCTCAAGTGGAAC-3'         | 59.7 | 5'-GGCGGATGATCTTGTCGAAC-3'    | 59.1 |
| HOXA5                                                                  | 5'-CAACCCCAGATCTACCCCTG-3'       | 59.2 | 5'-GAACTCCTTCTCCAGCTCCA-3'    | 59.7 |
| EN1                                                                    | 5'-AGCAGCCTCTCGTATGGC-3'         | 59.2 | 5'-CTCCGTGATGTAGCGGTTTG-3'    | 59.0 |
| METRIN                                                                 | 5'-CTTTGAGCTGCGGAGGA-3'          | 60.4 | 5'-AGACTCCTGCAGCTCCAC-3'      | 58.6 |
| PAX9                                                                   | 5'-GAACGGGTTGGAGAAGGGAG-3'       | 60.0 | 5'-AGCAGCACTGTAGGTCATGT-3'    | 59.0 |
| RETL1                                                                  | 5'-CGAGGAGGGAGGAAGAAGATC-3'      | 59.0 | 5'-TTCTTGGGGTCCTCAGCAAA-3'    | 59.2 |
| Primers used in the production of lentivirus and transfection of hASCs |                                  |      |                               |      |
| GENE                                                                   | FORWARD                          | Tm   | REVERSE                       | Tm   |
| FGFR1                                                                  | 5'-GGAAAGTTGAAATTTAAGGGAA-3'     | 59.6 | 5'-ACCCTTCTCTTCCTACAACCTA-3'  | 59.5 |
| GRM4                                                                   | 5'-GAGGGTAAGTTTTGTGGAGAAT-3'     | 59.8 | 5'-ACCAACCAAAACACTAACCTTAA-3' | 60.0 |
| HOXA5                                                                  | 5'-TTAAAAAATAAATGAGTTTTTATTTG-3' | 56.4 | 5'-ACCAACCCCCTCTCTACTACTA-3'  | 59.4 |
| EN1                                                                    | 5'-TGGTTTTGGGGTTATTTTATAG-3'     | 59.2 | 5'-AACCTAACTATTTTACACCCCC-3'  | 60.9 |
| METRIN                                                                 | 5'-GTTGTAGTTGGAGGGGTAGGTA-3'     | 60.6 | 5'-AACCRAATACAACCACTCAAC-3'   | 60.3 |
| PAX9                                                                   | 5'-AGGGTTTTTGGAGTTTAATGGA-3'     | 62.0 | 5'-ACCAACCACTAACCACACAAAC-3'  | 62.5 |
| RETL1                                                                  | 5'-TGTATGGGGGTATTGAAATTT-3'      | 62.5 | 5'-AACTCCCATAACCCCAAAAAAC-3'  | 62.4 |

Tm: melting temperatures in °C
