# Supplementary material for: Impact of the Epigenetically Regulated Hoxa-5 Gene in Neural Differentiation from Human Adipose-Derived Stem Cells
Source: MDPI journal article supplement (doi:10.3390/biology10080802), 2021-08-19
Supplement: s1 [file s1 › Supplementary Table S3.pdf]

**Table S3.** Sequence of the Hoxa-5 wild type, sequence of Hoxa-5 truncated gene and protein and primer design and methodology employed for the construction of the transfection vectors.

**Hoxa-5 gene sequence**

ATGAGCTCTTATTTTGTAAACTCATTTTGCGGTCGCTATCCAAATGGCCCGGACTACCAGTTGCATAATTATGGAGATCA  
TAGTTCCGTGAGCGAGCAATTCAGGGACTCGGCGAGCATGCACTCCGGCAGGTACGGCTACGGCTACAATGGCATGGA  
TCTCAGCGTCGGCCGCTCGGGCTCCGGCCACTTTGGCTCCGGAGAGCGCGCCCGCAGCTACGCTGCCAGCGCCAGCGC  
GGCGCCCGCCGAGCCCAGGTACAGCCAGCCGGCCACGTCCACGCACTCTCCTCAGCCCGATCCGCTGCCCTGCTCCGC  
CGTGCCCCCTCGCCCGCAGCGACAGCCACCACGGCGGGAAAACTCCCTAAGCAACTCCAGCGGCGCCTCGGCCG  
ACGCCGGCAGCACCCACATCAGCAGCAGAGAGGGGGTTGGCACGGCGTCCGGAGCCGAGGAGGACGCCCCTGCCAG  
CAGCGAGCAGGCGAGTGCAGAGCGAGCCGAGCCCGGCGCCCGCCCAACCCCAGATCTACCCCTGGATGCGCA  
AGCTGCACATAAGTCATGACAACATAGGCGGCCCGGAAGGCAAAAGGGCCCGGACGGCCTACACGCGCTACCAGACC  
CTGGAGCTGGAGAAGGAGTTCCAATTCAACCGTTACCTGACCCGCAGAAGGAGGATTGAAATAGCACATGCTCTTTGC

| PRIMER      |         | SEQUENCE                                            | Tm   |
|-------------|---------|-----------------------------------------------------|------|
| EXON A      | FORWARD | 5'-AAAAAAGAATTCGCCGCCACCATGAGCTCTTATTTTGTAAACTCATTT | 69.1 |
|             | REVERSE | 5'-GCCTATGTTGTCATGACTTATGTGCAGCTTGCGCATCCA-3'       | 67.6 |
| EXON B      | FORWARD | 5'-CACATAAGTCATGACAACATAGGCGGCCCGGAAGGC-3'          | 69.0 |
|             | REVERSE | 5'-AAAAAAGGATCCTCAGGGACGGAAGGCCCTCCTG-3'            | 69.1 |
| EXON FUSION | FORWARD | 5'-AAAAAAGAATTCGCCGCCACCATGAGCTCTTATTTTGTAAACTCATTT | 69.1 |
|             | REVERSE | 5'-AAAAAAGGATCCTCAGGGACGGAAGGCCCTCCTG-3'            | 69.1 |

CTCTCCGAGAGACAAATTAAATCTGGTTCCAAAACCGGAGAATGAAGTGGAAGGATAATAAGCTGAAAAGCAT  
GAGCATGGCCGCGGCAGGAGGGGCCTTCGCTCCCTGA

**Primer complete hoxa-5 gene amplification**

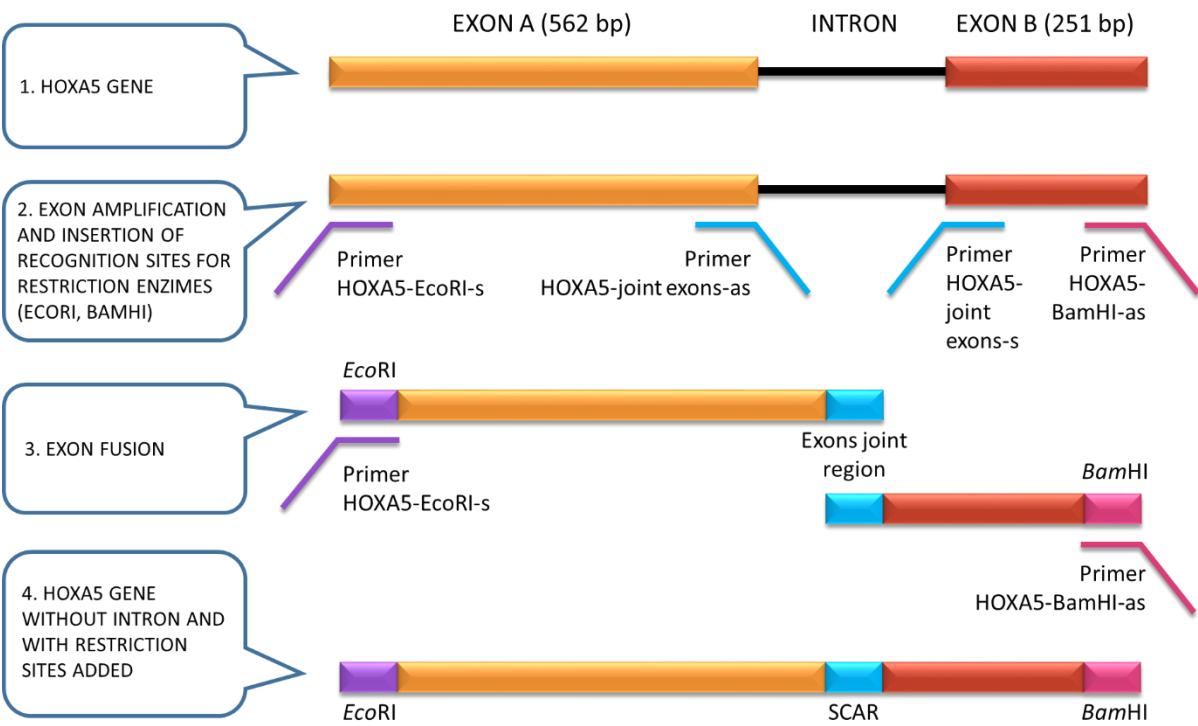

## Hoxa-5 protein sequence

MSSYFVNSFCGRYPNGPDYQLHNYGDHSSVSEQFRDSASMHSGRYGYGYNGMDLSVGRSGSGHFGSGERARSYAASASAAPAE  
 PRYSQPATSTHSPQPDPLPCSAVAPSPGSDSHHGKNSLSNSSGASADAGSTHSSREGVGTASGAEDAPASSEQASAQSEPSA  
 PPAQPQIYPWMRKLHISHDNIGGPEGKRARTAYTRYQTLELEKEFHENRYLTRRRRIEIAHALCLSERQIKIWFQNRMMKWKDNK  
 LKSMMAAAGGAFRP (Homeobox underlined)

## Truncated hoxa-5 gene sequence

ATGAGCTCTATTTTGTAAACTCATTTTGCGGTCGCTATCCAAATGGCCCGGACTACCAGTTGCATAATTATGGAGATCAT  
 AGTTCCGTGAGCGAGCAATTCAGGGACTCGGCGAGCATGCACTCCGGCAGGTACGGCTACGGCTACAATGGCATGGATC  
 TCAGCGTCGGCCGCTCGGGCTCCGGCCACTTTGGCTCCGGAGAGCGCGCCCGCAGCTACGCTGCCAGCGCCAGCGCGGC

| Primer          |         | Sequence                                         | Tm   |
|-----------------|---------|--------------------------------------------------|------|
| FRAGMENT 1      | FORWARD | 5'-AAAAAAGAATTCGCCGCCACCATGAGCTCTTATTTTGTAAACTCA | 69.1 |
|                 | REVERSE | 5'-GCTTATTATCGCCGCCTATGTTGTCATGACTTATGTGC-3'     | 65.5 |
| FRAGMENT 2      | FORWARD | 5'-CATAGGCGGCGATAATAAGCTGAAAAGCATGAGCATGGCC-3'   | 68.6 |
|                 | REVERSE | 5'-AAAAAAGGATCCTCAGGGACGGAAGGCCCTCCTG-3'         | 69.1 |
| FRAGMENT FUSION | FORWARD | 5'-AAAAAAGAATTCGCCGCCACCATGAGCTCTTATTTTGTAAACTCA | 69.1 |
|                 | REVERSE | 5'-AAAAAAGGATCCTCAGGGACGGAAGGCCCTCCTG-3'         | 69.1 |

GCCCGCCGAGCCCAGGTACAGCCAGCCGGCCACGTCCACGCACTCTCCTCAGCCCCGATCCGCTGCCCTGCTCCGCCGTG  
 GCCCCCTCGCCCGCAGCGACAGCCACCACGGCGGGAATACTCCCTAAGCAACTCCAGCGGCGCCTCGGCCGACGCC  
 GGCAGCACCCACATCAGCAGCAGAGAGGGGGTTGGCACGGCGTCCGGAGCCGAGGAGGACGCCCCCTGCCAGCAGCGA  
 GCAGGCGAGTGCGCAGAGCGAGCCGAGCCCGGCGCCGCCCAACCCAGATCTACCCCTGGATGCGCAAGCTGCA  
 CATAAGTCATGACAACATAGGCGGCGATAATAAGCTGAAAAGCATGAGCATGGCCGCGGCAGGAGGGGCCTTCCGTCC  
 CTGA

## Primer truncated hoxa-5 gene amplification

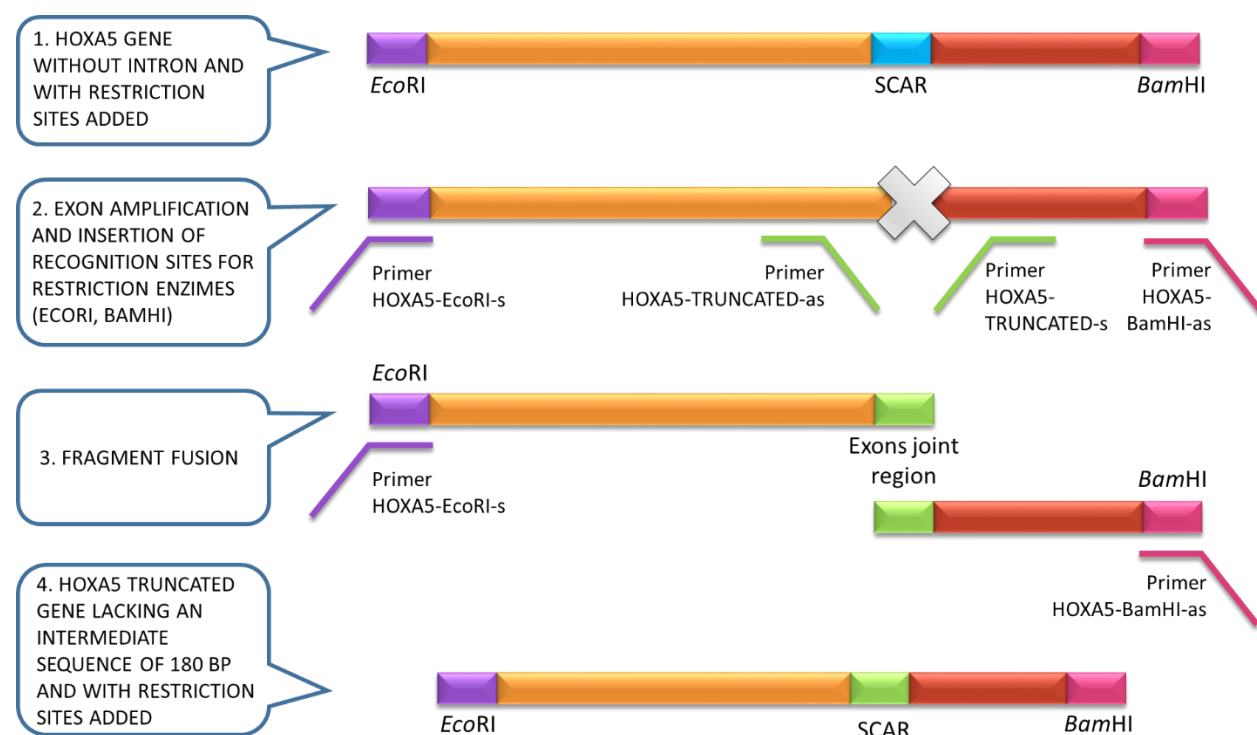

**Hoxa-5 truncated protein sequence**

MSSYFVNSFCGRYPNGPDYQLHNYGDHSSVSEQFRDSASMHSGRYGYGYNGMDLSVGRSGSGHFGSGERARSYAASASAAPAE  
PRYSQPATSTHSPQPDPLPCSAVAPSPGSDSHHGKNSLSNSSGASADAGSTHSSREGVGTASGAEDAPASSEQASAQSEPSA  
PPAQPQIYPWMRKLHISHDNIGGDNKLKSMSMAAAGGAFRP

---
