# Supplementary material for: Impact of the Epigenetically Regulated Hoxa-5 Gene in Neural Differentiation from Human Adipose-Derived Stem Cells
Source: MDPI journal article supplement (doi:10.3390/biology10080802), 2021-08-19
Supplement: s1 [file s1 › Supplementary Table S4.xlsx]

## Sheet: Hoja1
Table S4: Methylation status of candidate genes
Hypomethylated candidate genes
Target	hASCs beta value	Induction beta value	Induction-hASCs beta value diference	Refgene gene code	Forward sequence
cg24568646	0.5552	0.0870215	0.468178	CCT8	GACAGCCCAGGCCGTGAGAGGTTGCTCCAGTCTGTGCTCTCTGACCGTAGTCAGTAGTCA[CG]GCGTTAGATTTTTGCGGTTTTTGATCTGGAAGCCACACATCCTTAGCTTAATTTCCACGT
cg14037413	0.528902	0.0766384	0.452264	ZNF143;ZNF143	GCGGGTTGCGGGGCCTGGGGGCCGGACGGCTGTTTCCTGTCCTGGTGCATGGTGGTCGGA[CG]AAGGAATTGTTGGAAAATTTTCTCGGAGGTTCGTATATAAATGTGTTTTTACCCAGTGTG
cg15538820	0.920417	0.498857	0.42156	OBP2B	TCCTCATTGCTGGCATCTGGTGAACAGCAAGTCAGTGCCAGCCAGAGAAGAAAAGACACA[CG]ATGCCATCCAGAGTTTGCACCACCCGAACGCGCCCACTCAGATGAGCCCAGAGGACTCGA
cg23617121	0.825441	0.408536	0.416906	OSBPL5;OSBPL5;OSBPL5	CGTAGGGCATGGTAAGGGTGTAATCCTCGGCTCGGTTCAGGAAGGTGAGCGTGGCTTTGC[CG]TCCAGCAGCGCCGACAGCGAGTTCCCTGCAGAGACAAGAGACAGCAGGACCAGTGAGTGC
cg08717396	0.483748	0.0731639	0.410584	HIST1H2BJ;HIST1H2AG	GACGCACTACTATTGGTTGAAATTAAACTGCAGCCCTAACCAACAACACGTCTTCTTTTT[CG]CGCCCAATAGTGTTTATAAAAAGCGCCGCCTTTCCCGTTCACTTTGTGGTTGCTCGTAGT
cg07638938	0.834323	0.432286	0.402037	MGMT	ACCGCCACCCAGCACCGGCATGTTTCACAGTGTTCCGCAGCCACCACCGCCGCCCAGCAC[CG]GCATGTTTCACAGTGTTCCGCAGCCACCACCGCCACCCAGCACCGGAATGTTTCACAGTG
cg08376864	0.474729	0.091739	0.38299	MGC2889;HRASLS	TACTCATGATGGGTGTACCCGAACATTCCTGGGCTCAACAAAACCGATTATCTTTATAAC[CG]CGGCGCCTAGCACAGCGCCTGGTGCCCTAAACGTTGGCTGCGGGAACGTCCGAGACGCGG
cg06719391	0.456574	0.096895	0.359679	KCNQ1;KCNQ1	CTTGGGGAACCCAGGAGGGGCCGGGCGGGTGCAGGACCCGCATGAGGGATTCCGAGAGCA[CG]ATGTTTAAATGTTGGGGGAAAAAATGGATCAAAGCGATGTGTTCCCAGGGAGCCCCTGTT
cg16431978	0.683534	0.324782	0.358751	KRTAP13-3	AGTGAGGAGCAGCTCCTGGATCCACAGCTCAGGGAGCAGCAGCTATTGGATCCAAAACCC[CG]AGACCCAACATGCATAGTCAGGCAAGAATTGCAGAGCATGTGAGTCCTGGGGTAGTAGCA
cg07371530	0.796399	0.439565	0.356834	RPUSD1;CHTF18	GCCACTGAGCCCCGGTCTCTCTCCAGAGTCTCAGAAGCTGCTGCCGACGTGGGTCTCACA[CG]GGCCTCACCAGCTGCCCGCAATCCCGTCCTGAGGCGGCCCCCCATCTTGGAGGACTACGT
cg02248486	0.644983	0.298361	0.346622	HOXA5	TCACGGAACTATGATCTCCATAATTATGCAACTGGTAGTCCGGGCCATTTGGATAGCGAC[CG]CAAAATGAGTTTACAAAATAAGAGCTCATTTGTTTTTTGATATGTGTGCTTGATTTGTGG
cg00510787	0.427789	0.0819161	0.345872	C6orf211;RMND1	TTGGGAGTATGCCGTTCAATTCCTCAAACTCAAAATTATTTTATCGATTTCTACAGTTAC[CG]CGGTGCACTGGCTCAAAAAAAGGGTTCATTAATTGAGTGCTTTTTACTCCCAGCTAAGCT
cg01962826	0.796741	0.451025	0.345716	GRM4	CAAAGGTCAGCGACTGCTCGAGGGCATGGGTGTCCCTGGAGCAGGTGTCCAGAATGCGGG[CG]CCCAGCGTGATGTTAGGCAGCAGGTCCGGGTCGTTGTTGATGCGATCCAGGGCGAACAGC
cg08722122	0.77409	0.431211	0.342879	FGFR1;FGFR1;FGFR1;FGFR1;FGFR1;FGFR1;FGFR1	CTGTTTTCCCATCTGTAAATGGGGGATAATAGTGCTTTTCACATAGAGTTGAGGCGTCAA[CG]AGGGCCTAGCGCATAGTTAACACTTAGTAAATACAAGCCGGTTTTATTATAAGGTCAGCC
cg10143146	0.451028	0.109931	0.341097	COL11A2;RXRB;COL11A2;COL11A2;COL11A2	CCCCCCAAGCCCGAAACGGCGCTGCCCATCCTCATACAGTCACCTCAGTCCAGAAAACAG[CG]ATTTTAATTTGAAAGCGATTTTATGTATGAGAGGGGAAAGGAGCCCCAAAGAGAAGGGAC
cg23347958	0.410195	0.0696409	0.340555	DHX8	GTTTGATCTCTATGATCCATCCTGTTGGGACTTGATTCGTTCCTCAAATTTTCAATTTAC[CG]TAAACAAAGGGGACGCGCGCTGACCCGGAAGTGAAAGCTGGAACCCGGCCGGAGTAGCTC
Hypermethylated candidate genes
Target	hASCs beta value	Induction beta value	Induction-hASCs beta value diference	Gene	Forward sequence
cg17003970	0.136012	0.834915	-0.698903	CHFR;CHFR;CHFR;CHFR;CHFR	TCAAGGTCCCCATCTACAGGAGAAAGGGATGTGTTCTGTCGTAACCAAGAAGGAAATACA[CG]CAGGTTCAGGTCAAGGTCCCCGTCCACAGGAGAAAGGGATGTGTTCTAACTGTCGTAACC
cg15279364	0.179879	0.741548	-0.561669	TMEM130;TMEM130;TMEM130	TCTAAATTCGCATCTCCCCAAAGCCAGCACCAACACGGTGGGAAACCCCTCTAGATGAGG[CG]ACATTTTAAGGCAAAAACGTTGCCCATCCCGTGCTCCCTGGGGGACTGGGGAATTGTGGC
cg16435601	0.0085138	0.528843	-0.52033	BPTF;BPTF	TGAGATGGAAGAGGACGACGATGACTCCGATTATCCGGAGGAGATGGAAGACGACGACGA[CG]ACGCCAGTTACTGCACGGAAAGCAGCTTCAGGAGCCATAGTACCTACAGCAGCACTCCAG
cg18403361	0.041432	0.513266	-0.471834	CLEC14A	GGCTTATGATTATAAGACCACGCCCGTCTATTGTGTTTCTGTCCGGAGCTGTGGAGTTAG[CG]TCAGAATAATTCGTAGACGGCTCCAGTGTTTGGGGGGCCTGTGCCTGTGGGGGAAAAATA
cg08585897	0.213348	0.681083	-0.467735	KARS;TERF2IP;KARS	TTTCATTCAGGGTCTGGCTCCGTCTCAGTAACTCCTTGGGGAAAGCGATGGAGAAGGGCT[CG]CTCACGCAGCACTTCTGGCAGTCCCTGAAGGACCACTACCTCAAGTCTCCCAGGCTGGAG
cg06834875	0.156732	0.617054	-0.460322	HHIPL1;HHIPL1	CTCTGGCCCTGCGCCTCCCTGGCTAAAGAGCGCCCTGTGGGGAGGAAGCAGGGCCCCAGG[CG]GAACCGGGAAAACACACCGGGGCTTTAAACAGACCGGGCCACTCCCATCGAATTTGGAAA
cg12792157	0.0122104	0.469324	-0.457114	MYCBP;MYCBP	CACGCCGCGCCCCCCTCACTTTGTAATGGGCCATAGTGACAGCGGCAGCGGCGTAGCTGG[CG]CCGGAGACCGCGACTGGCGGGTTGGGAGCAGCACTGCTCATGCGCGGAAGGGGGCGCGCG
cg01963696	0.125888	0.57762	-0.451732	ELANE	AGGCCACCCCCATCAAGTCCCTCAGGTCTAGGTTTGGCAGGTTTGGCAAAAACACAGCAA[CG]CTCGGTTAAATCTGAATTTCGGGTAAGTATATCCTGGGCCTCATTTGGAAGAGACTTAGA
cg15792688	0.0316756	0.456517	-0.424842	ZNF718	GTCTGTGAATGGAGTTCCCGCTCAGCCCTCTGTCCTCAGTCCCCTCCGGTGAGGGACCCG[CG]CTCTTGTCAGTCCCCGTACAGCGGCTCTGGCCCAGCCTGCAGCCCTCCTTGTGCAGCTCT
cg11743470	0.218967	0.640142	-0.421175	GCNT4	CAGATAGTAAATATTTTTGGCTCTGTGGGCCATATTGTCTCAGTCACAACTACTCAATTC[CG]CCCGTTATGGTAGGAAAGCAGCCAGAGATTATATTTCAATGAGTGGGTGTGGCTGAGTTC
cg12045829	0.073878	0.486463	-0.412585	TNFSF12;TNFSF12-TNFSF13	GCTGCTGGGGCATGGGAAGTGTGCACAGCCGAGGCTGCAGGTGTGTGCAGCTGTGCCAGC[CG]TACTCGAGGTGTGTGCAGGGTGTGTGTGAACACAGTGCGTGCATGGGTGCGTGTCTGCAG
cg03908676	0.187864	0.598611	-0.410747	LYVE1;LYVE1	ATCCGGATTTCCCTGCTTTCAAGCTTCTGACTTGTCAAGGTCACTGGGGGAAATGAATGA[CG]TCCCTTGAACGCCCAGGCTGTACTTTGTGGATGGCCTTCTGGAAAATTTAGCTAATGCTG
cg00945507	0.0937571	0.499813	-0.406056	SEC61G;SEC61G	TGGGATTACAGACGTGAGCCACCGCGCCCGGCCATGTTTCCTTTTAGCAATGGAGCATAA[CG]GGATCTGAGGAACAATATAACTCAGGAAGAGCTGATGGAACATTAAGACGTGTTACAACT
cg08009711	0.252714	0.655659	-0.402945	C2CD2;C2CD2	ACAGTCTGCTATTAATACAGGATTTTAAAAAGTTAAATAGAAGCAATTATTTGGCATAGG[CG]GCAGTGACAGTGAACTCCTCAGAGGACAGGAGTGAACCCCCAGCCCCAGGGAAGAACTCC
cg22108175	0.091349	0.492495	-0.401146	LPL;LPL	CCCGGGTAGAGTGGAACCCCTTAAGCTAAGCGAACAGGAGCCTAACAAAGCAAATTTTTC[CG]TCTGCCCTTTCCCCCTCTTCTCGTTGGCAGGGTTGATCCTCATTACTGTTTGCTCAAACG
cg22377389	0.0901162	0.490061	-0.399945	GJB6;GJB6;GJB6;GJB6	TGCCTTCTGGTGCCTGCACGTTTTAACTAAGATGTGTCGCCAATTACTTTTAATTACTGT[CG]TCCACGCTATTGTCATCAGCATTTCACAAGTTTCTCGGAAGCCCATCACGCAGCCCATAC
cg24893837	0.346819	0.746763	-0.399944	ARSB;ARSB;ARSB	GTGTAGGGGAAAATTTTTGCATTGCCTAGAGACCATACCCTTCCAGGTTGAGTCTGATTC[CG]TGGAAGTTGTTTACAACTTTATAAGTTATAGATAAATAACAATGGAAAATAATTCTTATT
cg12078929	0.0384413	0.435833	-0.397392	SERHL	CTAGGCAGGCGTGAGGGTGTGACGGCCGCGCATTCGCCAGACGAGAGCGATGGCTGAGAA[CG]CCGCACCAGGTCGCCTTAGACTCACCAGGTCGCCTTAGACTTAGATGGGACGGGGAGGCC
cg03302287	0.0262592	0.422957	-0.396698	PKP2;PKP2	CCAGTTGTCCCAGGATCTGCTGGCCCAGGACGGTCCGGATGTAGCCGTACTCAGCTGGGG[CG]CCGGGGGCTGCCATGGGGCCGGTGGGGGCGACCGAGCTGCTCGCCTGCCTCTGGACTCGC
cg18292711	0.171674	0.56237	-0.390695	KIF5B	CACCCTCGCCGCCCCCACGAAGTTCAGCGAATTCCCGCCACTTTCCCTGCAATGAACATA[CG]GAACCCATCAATCCCAGTGCTGGAGGAATGACTGACCTGGAGCCTAAAGATGGTCTTTAT
cg08818984	0.338786	0.72843	-0.389644	NR3C1;NR3C1;NR3C1;NR3C1;NR3C1	ACCCTCTTTCTGTTTCTATTCCTTCCCCACTCATGCCCCAGTGCTTCCGTTGGACACATG[CG]CATTTTACGGTCCTGCAGGGCTTGAAAGATTTCTGACCTTCTAAGGTCCAGTGATTTGGT
cg24747122	0.471137	0.860402	-0.389264	GNA13	CCAGGGGCATTTAATGGCTCACTCGTGCATTCCACCTGGGCTGTGATGTGACTTCAGGGA[CG]CTTGGCCGCGCCGGAATTAGCGAGTGGCAGCAGGAGGGTGAGGTCATGGTGAAAATCCCC
cg06488678	0.258672	0.647832	-0.389159	TMPRSS9	ACCGGGAAGTGACTTGATGGTGTCTCCTTGGCCATCTGGAATCAAAGGGCAGTGTCTAGG[CG]TGGAGATGAAGGCTGCCCTAGGCCAGGCGGGTGGGCGGGGAGTGGAGCAGATGAGTTCCT
cg20977864	0.196798	0.585602	-0.388804	HYDIN;HYDIN	CTTCTGCCCTTCAGGCTACCTGTCTGGCAGGGGAATCCCAAGAACAAAAATCCGAGGTCC[CG]TAACTTTCATGGGAGTGAGAAGTGGCTAGGGAAGGCTGAGGAGGGGAGGGGTCTGGAAAG
cg14159672	0.210869	0.599114	-0.388244	PM20D1	GGCCCATCGATCTGGAGACGGTAGGGAAAACTAGGAGCAGCATAGCCACCAGGGCCAGCA[CG]CAAACGCACCGCTGAGCCATGCTTCTCTCGAGCTCCTGCTGTCAGGCTACCGGGGTAGTT
cg03459809	0.147403	0.533991	-0.386588	EPHX1;EPHX1;EPHX1	ACCACGCTGTGCACACATGAGATTGGCTGACTTGGCAGGACTGTGCAATTGTCAGAAGGC[CG]TGGGGAGTGGGGGCCAGTGCCTGCAGCCTGCCCTGCCTCTCTCACAGGCCCTTAGAGCAT
cg26853855	0.256595	0.640621	-0.384025	CSRNP3	TGGCTCTCTCAGACAAAACTCCATGTGATCACATATAGGCAGCCTCAGTGAGGCTGATGC[CG]TGCAGCAAGCAGTAGGTAATGAGTCTTTGTGCAGAGTGAAGCTCTTGTTGCTGAACAATA
cg16894211	0.250962	0.634856	-0.383894	SYN3;SYN3;SYN3	CGGAAATGAGCCCTTTGGGAGGTAATTATGGTTAGTGGGGTCATGAGGGTGTGGCCCACG[CG]ATGGAAGTACAGCCCTTATAAGAAAGGATGCCAGAGAGCTTGCTTTCCCTGCACTGTGTG
cg11027330	0.0681688	0.451636	-0.383467	METRN	AGGAAGGAGCAGGCCCGGCCGCCCGCGAGGCGGAACCACCAGGTGGGCCACCTTCCCTAC[CG]CCACCCCGAGGTTCCAGTGGACATCAAAACCTCGGCTCCATCAGAGGCTCCAGGACTCCG
cg04711324	0.369498	0.752534	-0.383037	RIT2;RIT2	CAAAGCAAAGGTTTTAGTACGAGGTAAGAACCATCAGCGTCGGGCTGGCTGCTGGTCCTC[CG]CTCGAGCGGGTCTCATAGCAACCACTTCAATTGCTTCCAATAAAAATCTGGCTTTTGCAT
cg11286122	0.0558169	0.43359	-0.377773	PHLDB1;PHLDB1;PHLDB1	CCTCCCCAGCCAGTCTCCTGGACCAAGAGCTGGCTTTGCAAGGTAAGGATCCACTGTCAG[CG]TTGGATTTCGGAGTGGAGGTTGAGATGGAGAATGACTTCAACCTAGCTCAATTTGGGGGC
cg18490846	0.0965578	0.474233	-0.377676	C17orf73	GCAGCCAAGACTGTGAACCACTGATTTGGCCAAACTGCTTAAAGGAGCAAACAGGGAAAA[CG]AGGCCTTAGTAAGTGAAATGTTTACCACTAGTCACGTGGCCAGCCAGGCACAGGCCTGGC
cg20684549	0.146594	0.523308	-0.376714	LPPR3	GTCGCAATCCGAGGTCTCCGGGCCCCAAACGGCAGGATTTACAAAAATCGGTTTTTGGGC[CG]TGCGCGGTGGCTCAGGCCTGTAATCCCAGCACTTTGGGAGGTCGAGGCGGGCGGATCACG
cg08338368	0.270377	0.644634	-0.374257	IL26	ATGAGTGGATCTCTTGGAAGAATCCAAGCCTTATTTCCCCAGGAGCAAGATCACTGGTAA[CG]ACACACCCTATCAATTGAGATGAGAACTATTCACAAAAAAACTATAGCAGAAGTCAGCTG
cg03605761	0.0844114	0.458439	-0.374027	RNF126	CTCTCGGGTGCGGAGAAGGCAGGAAACCTAACCCCTGCTTCCAAATTTAATCAGTAGAAA[CG]GTATCATCACCCAGCACAGGCCAGGATCATTTCTGAGGTTAGTTCTGGCCCAATCATGCA
cg22335801	0.0786668	0.451829	-0.373162	TNFRSF4	GTGGGAGCTCACTGAGGTTACACCACGTGCAGGGCTTGCACGGCTTGGAGCTGACCACGT[CG]TTGTAGAAGCCCGGCCCGCACGGACGGCACACCGTGTTCTGGGAGCGGCTGCAGCGGCTC
cg02953306	0.0713555	0.443549	-0.372194	CHRNA2;CHRNA2	CTGGGCAAGCTCTGCAGAGAGGTGGGTTTTCCTGGGGCTGTCCAGCTCTGGCAGCCAGAA[CG]GCTTCATGCAGGTGCCACTGAGGACAGCCCAGGCAGCCCAGCACAAGCGATTCTGCAGGT
cg26750002	0.285486	0.656633	-0.371147	IZUMO1;RASIP1	GCGGCTTGCCAGCATTTTCTCGGGCTGCAGAGGCTGGAGGCTTATGGACGACTCCGTGGT[CG]CCTCCCCCGGGGTTACGATATTTGGAGAAGGTTTTTCCTCCTTGATCATTTTGGGCAACA
cg03266453	0.326066	0.695477	-0.369411	EN1	AGAGGCGCAATTTGTTTTTCACAAATAGCAAAATCTGAAAGGCCCGCTGCGCCTAGCTAG[CG]TCGCACGTTTACGTTTGTACGTCTCCTGCCGGCCCGCTGCATTGCTTTCCCTTTGTGGGG
cg11880010	0.324041	0.692814	-0.368773	PRUNE2	CTTGTCTGTAAATGCTTTCAAGTCACTGGTAATATTGCTGTGAAATAGACAATTCTGAAA[CG]ACAACAGGAAATTTGATATTAATGTCAAACTGCCCAGCTGCGGGGAGTTGTTCCACAAAT
cg05358404	0.129753	0.498157	-0.368404	RTEL1;RTEL1	TGGGTGCCAGTGAGTGCTGGGGCTTCTCCGAGCACTATCTCACACCCAGGAGCGTGGGCA[CG]CATGGCATTCGCATGTGCCGTCAGTGGACATTAAACACAGCCATGAAGAAGCCACGAAGA
cg14473145	0.175615	0.543069	-0.367455	CLEC14A	TGTGTGGTTTTTCTCCGTTCAGGGAGTTTCATCAGGACCGCAGAACCCATAACACGTAAG[CG]AACATAGGCAGGAAGGACTTGAGAAAGGAACTGGCTTATGATTATAAGACCACGCCCGTC
cg26850754	0.0775262	0.444194	-0.366668	CD8B;CD8B;CD8B;CD8B;CD8B	GGCTCTCCGGTCCCCCGGGGTAATGCGATATGGGGGTATTTTATTTCCACCCTTAGGGAC[CG]TGCCTGCCAAGCTGCCTCCCGGGCGCCCCGCCACCGCGGGCTCGACGCTGCACCCTGCCA
cg26620157	0.383648	0.749828	-0.36618	PAX9	CGCTGCCACCGAGGGCCAGGGGCCCAGGACAGTGGCTGAATGTGGCAGAGCCTTGGGCTC[CG]TAGTGAGTGCCCCACGCACTGGCAATTGGTCGACTTGGGGCTGTGCGCTAGCGTTAGCCG
cg04457051	0.376436	0.736525	-0.360089	SCOC;SCOC	CTAGTGTAAATTGTGCTTAGACCAATAACACATTTAAAATTATAGAGCTTTTCATCACTA[CG]GAGATGCTCTTGCCTATGATAGGAACGATGGCTACATCTGAAGCTGAGCAAATTTATCTT
cg21301440	0.129041	0.4869	-0.357859	CYGB	TGCGCCCCCTCTCCTTCCGCCCAGCACCTCCATGCCCTCGGTGCACGAACGCGGCGGCGG[CG]GCCAGAAGTCCCCCGTGGCTTATGAATGACACGGACAGGCAAGAACCAGCCGCTGCCCTG
cg15448245	0.0450103	0.400165	-0.355154	GGT5;GGT5;GGT5	TTCCCAGTCTGCACAGAGGACAGGGGGACTTGACAGCATCAAATGCTGGTGACTACAAGA[CG]CCCATGTGGGGAATGCAGACAGACCATGCCTCTAGCCCTTGGCATCCGGGACCATTTGTC
cg26861460	0.132048	0.487016	-0.354968	PARVG;PARVG;PARVG;PARVG	TGTGCTCGTATTGCGTATGGAAGCCACAACTCTGCCAAAGCCACAATTTAATAGGTACTT[CG]TTCTGAGTGATGACAGGTAATTATTTTGCCATCACAGGCTACGATCTATTAGAACTCCAT
cg12111714	0.111692	0.466428	-0.354735	ATP8A2	CGGTGCAGCCCCGCGCTTCCAGTAGGGTCATGCGAATGCAGCCCTCACCGTTCTCTCCTG[CG]CATCCGTTCTGCGCCCAGCCTGCCTCTGAGCCCTGAGAAGTTTTCACTCTAATGTCACCG
cg20895877	0.171119	0.52225	-0.351131	PRIMA1	ACCCACCGACTCCTGCCTGCACCCTCGCTGACCCTGCATGCACGGCCCCAAGAAATCTCA[CG]CTGCCTGCACCCACACTGCCCAGCCGGCCTCATTGCGCACACTGCAACATAGGCACCTCC
cg25136310	0.0235942	0.37154	-0.347946	RPL36;RPL36	AACTGAGCCGGTACTCACCTCCGCCCCTTCTCCCCGTCGCTGTCCGCAGCCATGGCCCTA[CG]CTACCCTATGGCCGTGGGCCTCAACAAGGGCCACAAAGTGACCAAGAACGTGAGCAAGCC
cg10735607	0.162598	0.510394	-0.347797	TMEM109	GGCATGTTACAGTGTTCTTTTGGCTCTGTCGTCCGTGGACAGCTTAAGTGTTAACAGCTC[CG]TGGGCCCGCGGTTGCCCTCCACCAGCAAGGGCAGAGGGCCAGCGTGACAGCTTTTGTATC
cg18876487	0.202103	0.549599	-0.347496	AIRE	CCCGCTGCCCCCAGGCCCTGTGAGCCAGGGATAGTCCCCGGGGAAGTTCCAGGAGGACCC[CG]CCCCTCCAGATCCCCAAGCCCCTCCAGCCTTCCCCAACTCCCTCCCCACAAGGAGCCAGG
cg01081263	0.197914	0.545366	-0.347453	SCUBE2;SCUBE2	GTTCTCTGCTGAAAACCTAGGCTTGTTGCTGCTTCAGGGTAATTCCCAGATCGGAACAGG[CG]CTGTTCCGCTGACAGAAAAGTCTCTGGAGCCCACCCCGAAGCCATCAGCAGAACTTGCCG
cg00597076	0.162926	0.510174	-0.347248	MYO1C;MYO1C;MYO1C	CTGTGAGCAAGAGCTGCCTGCCCACTGGCGGGCTCCGACCACTCCGGGACCAGGAACCTA[CG]GTCTAACGCCGGGATGGCCACTTGGTTCTGCTTCAACTGCAGCCCCAGGGGATGTGGCTG
cg02061229	0.210355	0.557508	-0.347153	MMP10	TTTGTATTGGAAGACCAAGTAGACACAATTGAGCTGGCCAGTAGCTGCAATAGATGCCAC[CG]TTAATTACCTGGGCAAGATCCTTGTTGGAGTCCTCCTCTTTTGCTGCCCCACTCAGAGGA
cg01254505	0.133313	0.480459	-0.347146	BST2	CTGGAGTTAGGGGAGGGTGCTGGAATCTTCTACGGGCCACCCCTTTATTAGCATAGGAAA[CG]TCCTGACCAATAGCAAGTTCCAGGAAGTGCTCTGACCAGCAGCTCTTGCATGAGGCACCT
cg02084087	0.18876	0.5357	-0.34694	TNFRSF25;TNFRSF25;TNFRSF25;TNFRSF25;TNFRSF25;TNFRSF25	GCCTTTAACGAGATCGGAAAGGGCGGCCAACCCAGCCCCCAGTGAGGCTTGGAGTGGAGA[CG]CGCCCGGGGCCCCTTCCTTCACCGAGGCTCTTGGGACAGGGCTCAAAGCTGCCCCTAGCC
cg12629244	0.283884	0.629265	-0.345382	FAM20B	TTCACACGATTTATCCGCGCCCACTGGGTGCACTACGGTCGGGCATTGGCGACCCAGGAG[CG]ACTGACCTGCCCTCATGGGGCTTACGGTCCTTAGCAAAAAACAGATGTAAAACAACTAAT
cg22601917	0.294482	0.639336	-0.344855	H6PD	CTGTCTTTCTTAGCAATGTCTTAGCAAAAGTCTTCTATTTGCCACACGGGTCCAAGCTTC[CG]CTTACTAAGCACCCAAGTGCCAGACAACCCCGGAGGCAGGTACTCCCATTGTCCCCACTG
cg04498679	0.0947696	0.437559	-0.34279	C2;C2	ACTGATGGTTCTTTTTTGCCTGCTGTTCCTGTACCCAGGTAGGAGGCAGGGAAGGGGGAA[CG]TCAGGGTCCTGTGTGTGAGGTTGGTGCTCCCAGCTTGAATTCCCATGTGTGAAACAGTCT
cg09494546	0.223626	0.566285	-0.342659	SLC16A4	GATACATGCTAAAGTATTCAGGAGTAACATGACACTATGCTACCTTCTCCCAATCGGTTC[CG]TAAAATAAACAAGTGTATATAAAGAATGATAGCAAAAAGAAAATGTAAATGTTCTGAGGA
cg15798153	0.122035	0.464445	-0.34241	CDK14	TGCAAATCAATATCTTTCTGAAAAGACAGTGTGTTGTGAATTGCCTTGACAGCATATGCA[CG]GTTACTTTGGCTGCAATGCTGCTGCAGAGCCCGGTTACTCTGCCTTCGTGGGAACTCCAC
cg08077345	0.0641391	0.405222	-0.341083	PLEKHA4;PLEKHA4	TTAGGGATCCAGACTCCTGGGTGCCCGAGAAGGTCTGAGCTAGGATCAGGACTCCTGAGT[CG]TGAAAGAGCTGGGGGTCTGGAAACATGGCTGTGCTTGGAAGGGGCCAGGGACGGTTTGTC
cg19342782	0.124129	0.464834	-0.340705	HHLA3;ANKRD13C;HHLA3;HHLA3;HHLA3	AGTCTGTTCAGATAAATCTGTTTCTTCCTCTTCTTTCTTTTTCGGTGGAGTGGAGAGTTC[CG]TTTATGTTAAAACATTACCCAATCAACAGTTCAAAGCATCCTCTTGAGACAGCAGTAGAG
cg20592700	0.121222	0.461195	-0.339973	WIPI2;WIPI2;WIPI2;WIPI2	GCCGGGCCCACTCGCCGCGCGCCCAGCCATGAACCTGGCGAGCCAGAGCGGGGAGGCCGG[CG]CCGGCCAGCTGCTCTTCGCCAACTTCAACCAGGACAACACGTAAGGCCGGGGTCGGGGGT
cg26701826	0.309743	0.647534	-0.337791	SGMS2;SGMS2;SGMS2;SGMS2	TGGATTAGGCAAGGCTGCTAAAGAGAGACAGGAAATGGCTGTGTTAGTGCTTCGGACCTC[CG]TTAGAAGTAGCAGTTCATGGTGTTGAAGGTTTGTTGTTGAAAATACCTTCCTGAGGCACC
cg06497752	0.0100766	0.347631	-0.337555	COL9A3	CTGGCGGCCGCCGGGGCGCAGGTGAGCGCGAGCTCCGGGCTCTGAGGCTGGACGTGGAGC[CG]CGACCGCCCCAGCCCCGAACCCGCCACTCCGGGGTGCCCGGCGCAGCCTCGACGCCCCCA
cg04245402	0.102362	0.437518	-0.335156	C19orf21	GGGGCGCCCCGGGCCGGGCCGGGCGGGGATCCTGTGTGGGGCGGTTGGATCCACATTTGG[CG]TGGGAGCGTCATGTGTCTGTGGGCGGGGTCTGCTTGCCTGGCGGCACTTGGGATCCAGGG
cg21518208	0.3557	0.689513	-0.333812	KRT85	TGGGCTTGGGGAGTTTGCCAGCAACTCCCCACGGACTCATCTTAAAGGTGAGCTCAGCAG[CG]ACTCTGGGGCTCCCTGAAGTCTTGAAGATGTTATTAAGGAGACTGCATTTGAACTTTTCA
cg04999691	0.210123	0.54376	-0.333636	C7orf29;C7orf29;LRRC61;LRRC61	GAGGGAGCCGCGGAGGACTGGCAGCTGCAGATGCTGGAGCAGGCCAGCCTGTGGCTGGGC[CG]TAGCTTCCTGCTGGCAGGCTTCCTGGTATCGAGCAGCTGCCCCAGCCTGGAGCAGGCGGC
cg05744229	0.317503	0.650959	-0.333455	MYH7	CATATTGGTCCCATATGCTCAGATGCAGATATCTTCCCCTAGGAACTCCTGTGGCACATA[CG]CCCATGTTTAGACCTGCACATGTGTGCCCAGTGACTGGACCTGGTACTCTGCATGAAGTC
cg15928132	0.325983	0.659399	-0.333416	CCKAR	CATCCCAGACATATGCAGAAGAAAGCCCAAACCGGCTGTGTGAGACAGGAACAATTAACA[CG]GTAACAGATCCGATAATGCAGACCATCAGGCCTAAAGAACACGGAGGGACTGTGTTCTAC
cg05168404	0.119004	0.452169	-0.333165	SLC29A4;SLC29A4	GCCACCATGCCGCACCCTGGTGTGTTGGGGATCCTGATTTCAGCCTCAGCCTGGGCCTGG[CG]CCTGCACAGCCCAGCTGGATGGAAGGGTGGGGGGAGGGAGAAAGGAAGAAAGGAGATGGG
cg04375036	0.329775	0.66253	-0.332755	PPP1CC	GCAGCGCTTTACATTTTGCAAAGCCCCCTCTCTCCGAGAAATTCATTTTGTTTCCCAAGG[CG]TGCAGGATGCACGAATCCCCATCTCAGTATGCCACGAGGTAATTGCACCACCCAGGCATC
cg14787704	0.438445	0.770745	-0.3323	SFRS12;SFRS12	TATGTTATGTTAAGTTTCGTGATCCATCAAGTGTTGGCGTGGCCCAGCATCTAACTAACA[CG]GTTTTTATTGACAGAGCTCTGATAGTTGTTCCTTGTGCAGAAGGTTGGTATCTCGCTTTT
cg22815534	0.281233	0.613485	-0.332252	CECR4;CECR5;CECR4	AGCACGGAGGGCTGGGCTTTATACCTGTGCCAAGGACACCAACGGCAGCATCAGCAAGTC[CG]TGTTGTCTCCCAAATAAGTGGTGTTCTCCAACAAGCTTTTAGCAGTAATAAAGCTGACAT
cg22198623	0.0813508	0.413148	-0.331797	MT1G	AACCCAGGGACACTCTCTATGGTGTCTGGGAATTTGGCATCCCAAGGCACAGAACCCGGG[CG]TCCCTTACCAGCGGCACAGGAGCAGTTGGGGTCCATTGCAACCCGAGGCGAGACTAGAGT
cg25152348	0.00830133	0.339819	-0.331518	NCAPH2;LMF2;NCAPH2;NCAPH2;NCAPH2	CGCATTTTCCTGGGCGGGAACAGCAAAATGGCGCCAGAACTAGTGGCGGGCTGAGGACGC[CG]TACCCCTCGGAAGGCAGCCCTGCGGTCCCTTTGCCGCCCGTTCCCTCCCGGACATGGAGG
cg18702197	0.185159	0.516539	-0.33138	HOXD3	CTCTTTTTTAAAAATAAATAAATAAAAAATAATCAAGCGGCGAAAGTTGACGTCCGCCCA[CG]TGAATGTATTATATAAAGCAGCTACAGGACCAGCTGGCTTGAGAGCCCTGGTACCTCGGG
cg01737507	0.0140278	0.344909	-0.330882	PPIC	CCTCCCAGCACGCGAGCAGCCCCCTCCCACCCAGTCCCGCGGCCGCCTCCAGTCCCCCTG[CG]CCCGGGAAGCCTCCACCTCGCCCGCCCTGACACCGAGGTCCCAGTATCCAAAGCGCCCCC
cg04517429	0.0658559	0.396117	-0.330261	DCHS2;DCHS2	AGCCTTCCAGAAAACCCGAGAAATCTGTGGCACACATGGTGCAAACCACACTTTATTATG[CG]TGCTACTACCCAGCGACGTGTGAGCCTCTTGTCACTCCCCTCTGCCACCAGGAATGACGA
